# Supplementary material for: Startup investors and the net-zero transition: Drivers and barriers to engagement with Japan’s energy and innovation policy
Source: Research Square preprint supplement (doi:10.21203/rs.3.rs-7998556/v1), 2025-12-09
Supplement: Supplementary file 1 [file 7b8944daa1e651b911b54771.docx]

**SUPLEMENTARY MATERIAL**

| Table S1. Interview questions on investor perspectives of policies | |
| --- | --- |
| **Section** | **Questions** |
| Policy incentives for the energy sector | - Please tell us about the following effects of demand-side policies on energy markets: choice of portfolio companies, choice of technology sector, stock valuation and expected valuations, etc. - Please tell us about the following effects of supply-side policies on the energy market: choice of portfolio companies, choice of technology sector, stock valuation and expected valuations, etc. - Which policies do you think have had the most impact to date? |
| The history of Japan’s energy market | - What do you consider to be the most important event in the Japanese energy market? - What impact did this event have on your investment portfolio, investor preferences, market outlook, etc.? |
| Innovation policy instruments | - To further revitalize the energy startup ecosystem in Japan, what do you think is needed? |
| The interview questions were emailed with an online profile questionnaire prior to the interviews. | |

| Table S2. Summary of stakeholder feedback discussions | |
| --- | --- |
| **Participant profiles** | **Number of discussions** |
| Policymakers and former policymakers | 4 |
| Institutional innovation intermediaries | 2 |
| Consultants and startup supporters | 4 |
| Startup investors (non-interviewees) | 3 |
| Some meetings involved multiple participants at their request. The profiles represent key attributes of the major stakeholder group. | |
